# Supplementary material
Source: Research Square preprint supplement (doi:10.21203/rs.3.rs-8863642/v1)
Supplement: Supplementary file 1 [file aec60ef08a433580f6b0e351.docx]

Materials and Method

MSC-1090 was supplied as a quality-testing sample by a commercial manufacturer. Ethical approval and informed consent for donor-derived materials were obtained by the manufacturer, and no identifiable donor information was accessible to the investigators.

qPCR

We applied a validated qPCR to detect HHV6. Briefly, Genomic DNA was isolated from 200 µL of 107 cells/mL MSCs with cell culture supernatant using Roche DNA Mini Kit (Roche, 11858874001) according to the manufacturer's instructions. DNA was eluted in 50 µL of elution buffer and stored at -80°C until use. The qPCR was performed to detect and quantify the main capsid protein gene of HHV-6 (variants A and B) as previously described [1], primers and probes are listed in table 1. Amplification was carried out on a 7500fast Real-Time PCR System (Applied Biosystems, USA) with 3µL DNA as template. The assay demonstrated a limit of detection of 100 copies/reaction.

mNGS

Pathogen detection NGS library preparation and sequencing

Cell samples were collected in nuclease-free tubes and homogenized using a bead-based tissue disruptor. Total DNA and RNA were extracted using column-based purification kits (Genskey Micro DNA Kit) according to the manufacturer’s instructions. DNA concentration was determined using Qubit 4.0 fluorometer (Thermo Fisher Scientific). Approximately 5 ng of genomic DNA was used for library construction with a universal Pathogen Universal Library Prep Kit.

For RNA libraries, total RNA was treated with DNase I to remove genomic DNA contamination, followed by ribosomal RNA depletion. The purified RNA was reverse-transcribed into first-strand cDNA and subsequently converted into double-stranded cDNA, which was used for RNA library preparation using the same universal workflow.

Single-end 50 bp sequencing was performed on the GensKey S platform, generating approximately 20 million reads per sample. All reagents and kits used in this study were supplied by Genskey (PRC).

Bioinformatic analysis

Raw sequencing reads from both DNA (metagenomic) and RNA (meta-transcriptomic) datasets underwent quality control using fastp[2]. Host-derived reads were removed by aligning high-quality sequences to the human reference genome (T2T-CHM13) with BWA-MEM[3]. For metagenomic data, the remaining non-human reads were directly aligned to a comprehensive microbial reference database constructed from NCBI RefSeq and GenBank. For meta-transcriptomic data, residual rRNA reads were filtered by alignment to the SILVA rRNA database [4] prior to microbial classification. Taxonomic assignment was performed using the lowest common ancestor (LCA) algorithm, and viral identification was further verified against the RVDB (C-RVDB v29.0) database[5].

Detection of HHV-6 by ddPCR method

DNA was isolated from 200 μL of cell suspension and serum substitute with the TaKaRa MiniBEST Universal Genomic DNA Extraction Kit (TaKaRa. No.9765). DNA from different samples was eluted in 150μL. The isolated DNA was quantified using a micro-spectrophotometer and stored at -80℃ for subsequent ddPCR analysis. The primers and probe for HHV6 as same as qPCR [14] and RPL29 used in this assay as shown in Table 1. The ddPCR reaction mixture was prepared with a total volume of 18 μL per reaction, consisting of the following components: ddPCR™ Supermix for Probes (Bio-rad，1863024), Each ddPCR reaction (20 μL total volume) contained 10 μL of Droplet PCR Supermix, 0.9 μL each of 20 μM forward and reverse primers, and 0.25 μL of 20 μM probe for both the HHV-6 target and the RPL29 reference gene. 10ng Genomic DNA (2 μL) was added to each reaction, and nuclease-free water was used to adjust the final volume. Three technical replicates were set up for each sample, including negative controls, test samples, and positive controls.

Droplets were generated using Automated Droplet Generator and QX200 Droplet Digital PCR (BIO-RAD) according to the manufacturer’s instructions. Thermal cycling was performed on VeritiPro™ Thermal Cycler, 96-well (Thermo Risher) with the following program: 95 °C for 10 min, followed by 40 cycles of 94 °C for 30 s and 58 °C for 1 min, and a final step at 98 °C for 10 min. After amplification, droplets were read using a QX 200 droplet reader, and data were analyzed with QX Manager Software (V2.3.1). Droplet counts of per wells exceeded 15,000. The viral load, expressed as HHV-6 DNA copies per cell, was obtained using the formula: HHV-6 copies/ (RPL29 copies/2) because two copies of RPL29 are present in a diploid genome.

Table 1. ddPCR assay primers and probes for HHV6 and reference gene RPL29

| gene | Forward primer (5’-3’) | Reverse primer 5’-3’) | Probe |
| --- | --- | --- | --- |
| HHV-6 | CAATAATGGGTTTCGCTGATCT | GTAAGCAGACCATGCCAGTTC | FAM–CGACTCTCTAATAGAGCTTGGTT- TAMRA |
| RPL29 | ACCAGACCCATAATAAAGC | CAAGGGAGATAGCCAAAC | HEX- TCTCCACAGCCTGAAGTGTAACC- DBFQ |

Long-reads sequcencing and data analysis

Genomic DNA was extracted from hMSCs using the FineOut Universal Plant & Animal Genomic DNA Extraction Kit. DNA integrity was assessed using the Femto Pulse system. Approximately 6.5 µg of DNA was sheared using the Megaruptor 3, and the sheared DNA was purified with AMPure PB beads. SMRTbell libraries were constructed using the Pacific Biosciences SMRTbell Express Template Prep Kit 2.0. The libraries were size-selected for an insert size of 15 kb using the BluePippin™ system, followed by primer annealing. SMRTbell templates were then bound to polymerase using the DNA/Polymerase Binding Kit. Sequencing was performed on the Pacific Biosciences Revio platform with a 24-hour movie time.

Raw data were converted to FASTQ format using bam2fastq (v3.1.1). Quality assessment was performed with FastQC (v0.12.1), followed by adapter trimming and quality filtering using fastp (v0.22.0) with 10 bp trimmed from both the 5' and 3' ends of each read. The processed reads were then aligned to the human reference genome (T2T-CHM13V2.0) and the HHV-6B genome (NC_000898.1) using minimap2 (v2.28). Finally, the alignment results were visualized with IGV software (v2.16.2).

Reference

1. Feng Zhang L-yG, Xue Song1, Rong-rong Yuan, Xue-ling Wu, Jin-ping Fan, Shu-fang Meng. Establishment and application of quantitative real-time PCR for co-detection of HHV-6 and HHV-7. Chinese journal Chinese pharmaceutical analysis 2021, **41**(9):1565-1575.

2. Chen S. Ultrafast one-pass FASTQ data preprocessing, quality control, and deduplication using fastp. Imeta 2023, **2**(2):e107.

3. Houtgast EJ, Sima VM, Bertels K, Al-Ars Z. Hardware acceleration of BWA-MEM genomic short read mapping for longer read lengths. Comput Biol Chem 2018, **75**:54-64.

4. Quast C, Pruesse E, Yilmaz P, Gerken J, Schweer T, Yarza P, Peplies J, Glockner FO. The SILVA ribosomal RNA gene database project: improved data processing and web-based tools. Nucleic Acids Res 2013, **41**(Database issue):D590-596.

5. Chin PJ, Bhavsar JD, Bosma TJ, MacDonald ML, Polson SW, Khan AS. Refinement of the Reference Viral Database (RVDB) for improving bioinformatics analysis of virus detection by high-throughput sequencing (HTS). mSphere 2025, **10**(7):e0028625.
